# Supplementary material
Source: Royal Society of Chemistry journal article supplement (https://www.rsc.org/suppdata/cp/1999/5653/appendix1.doc)
Supplement: Supplementary file 1 [file appendix1.doc]

**APPENDIX**

**Initial and final molalities and H** (J kg-1) values for ternary aqueous**

**solutions of enantiomeric -amino acids at 298 K.**

L-PHENYLALANINE / L-GLUTAMINE

| mLi(PHE) | mLi(GLN) | mLf(PHE) | mLf(GLN) | H** |
| --- | --- | --- | --- | --- |
| 0.05778 | 0.01985 | 0.02805 | 0.009636 | 0.331 |
| 0.03128 | 0.01075 | 0.01542 | 0.005298 | 0.0908 |
| 0.04433 | 0.01523 | 0.02169 | 0.007451 | 0.205 |
| 0.05778 | 0.01985 | 0002805 | 0.009636 | 0.331 |
| 0.05069 | 0.01741 | 0.02470 | 0.008488 | 0.284 |
| 0.03745 | 0.01287 | 0.01839 | 0.006319 | 0.125 |
| 0.03128 | 0.01075 | 0.01542 | 0.005298 | 0.103 |
| 0.04433 | 0.01523 | 0.02169 | 0.007451 | 0.205 |
| 0.05778 | 0.01985 | 0.02805 | 0.009636 | 0.331 |
| 0.05069 | 0.01741 | 0.02471 | 0.008488 | 0.236 |
| 0.03745 | 0.01287 | 0.01839 | 0.006319 | 0.125 |
| 0.03128 | 0.01075 | 0.01542 | 0.005298 | 0.0554 |
| 0.04433 | 0.01523 | 0.02169 | 0.007451 | 0.170 |
| 0.05778 | 0.01985 | 0.02805 | 0.009636 | 0.295 |
| 0.05069 | 0.01741 | 0.02471 | 0.008488 | 0.200 |
| 0.03745 | 0.01287 | 0.01839 | 0.006319 | 0.137 |

L-PHENYLALANINE / D-GLUTAMINE

| mLi(PHE) | mLi(GLN) | mLf(PHE) | mLf(GLN) | H** |
| --- | --- | --- | --- | --- |
| 0.03518 | 0.009922 | 0.01725 | 0.004866 | 0.135 |
| 0.05013 | 0.01414 | 0.02433 | 0.006862 | 0.249 |
| 0.06570 | 0.01853 | 0.03155 | 0.008897 | 0.421 |
| 0.05746 | 0.01620 | 0.02775 | 0.007826 | 0.300 |
| 0.04222 | 0.01191 | 0.02061 | 0.005811 | 0.162 |
| 0.03518 | 0.009922 | 0.01725 | 0.004866 | 0.111 |
| 0.05013 | 0.01414 | 0.02433 | 0.006862 | 0.228 |
| 0.06570 | 0.01853 | 0.03155 | 0.008897 | 0.396 |
| 0.05746 | 0.01620 | 0.02775 | 0.007826 | 0.288 |
| 0.04222 | 0.01191 | 0.02061 | 0.005811 | 0.154 |
| 0.03518 | 0.009922 | 0.01725 | 0.004866 | 0.115 |
| 0.05013 | 0.01414 | 0.02433 | 0.006862 | 0.236 |
| 0.06570 | 0.01853 | 0.03155 | 0.008897 | 0.404 |
| 0.05746 | 0.01620 | 0.02775 | 0.007826 | 0.300 |
| 0.04222 | 0.01191 | 0.02061 | 0.005811 | 0.154 |
| 0.03518 | 0.009922 | 0.01725 | 0.004866 | 0.111 |
| 0.05013 | 0.01414 | 0.02433 | 0.006862 | 0.232 |
| 0.06570 | 0.01853 | 0.03155 | 0.008897 | 0.404 |
| 0.05746 | 0.01620 | 0.02775 | 0.007826 | 0.292 |
| 0.04222 | 0.01191 | 0.02061 | 0.005811 | 0.150 |

L-PHENYLALANINE / L-LEUCINE

| mLi(PHE) | mLi(LEU) | mLf(PHE) | mLf(LEU) | H** |
| --- | --- | --- | --- | --- |
| 0.03074 | 0.02775 | 0.01513 | 0.01366 | -0.420 |
| 0.04409 | 0.03980 | 0.02141 | 0.01933 | -0.821 |
| 0.05820 | 0.05253 | 0.02786 | 0.02514 | -1.39 |
| 0.05071 | 0.04578 | 0.02446 | 0.02208 | -1.15 |
| 0.03701 | 0.03341 | 0.01810 | 0.01634 | -0.70 |
| 0.03074 | 0.02775 | 0.01513 | 0.01365 | -0.420 |
| 0.04409 | 0.03980 | 0.02141 | 0.01933 | -0.906 |
| 0.05820 | 0.05253 | 0.02786 | 0.02514 | -1.44 |
| 0.03701 | 0.03341 | 0.01810 | 0.01634 | -0.652 |
| 0.03074 | 0.02775 | 0.01513 | 0.01366 | -0.420 |
| 0.04409 | 0.03980 | 0.02141 | 0.01933 | -0.858 |
| 0.05820 | 0.05253 | 0.02786 | 0.02514 | -1.42 |
| 0.05071 | 0.04578 | 0.02446 | 0.02208 | -1.16 |
| 0.04409 | 0.03980 | 0.02141 | 0.01933 | -0.833 |
| 0.05820 | 0.05253 | 0.02786 | 0.02514 | -1.43 |
| 0.05071 | 0.04578 | 0.02446 | 0.02208 | -1.21 |

L-PHENYLALANINE / DL-LEUCINE

| mLi(PHE) | mLi(LEU) | mLf(PHE) | mLf(LEU) | H** |
| --- | --- | --- | --- | --- |
| 0.03180 | 0.01528 | 0.01567 | 0.007352 | -0.485 |
| 0.04526 | 0.02175 | 0.02208 | 0.01061 | -0.961 |
| 0.03814 | 0.01833 | 0.01871 | 0.008993 | -0.751 |
| 0.03180 | 0.01528 | 0.01567 | 0.007532 | -0.497 |
| 0.04526 | 0.02175 | 0.02208 | 0.01061 | -0.997 |
| 0.05925 | 0.02848 | 0.02862 | 0.01376 | -1.67 |
| 0.05185 | 0.02492 | 0.02518 | 0.01210 | -1.33 |
| 0.03814 | 0.01833 | 0.01871 | 0.008993 | -0.762 |
| 0.03180 | 0.01528 | 0.01567 | 0.007532 | -0.533 |
| 0.04526 | 0.02175 | 0.02208 | 0.01061 | -1.03 |
| 0.05925 | 0.02848 | 0.02862 | 0.01376 | -1.69 |
| 0.05185 | 0.02492 | 0.02518 | 0.01210 | -1.38 |
| 0.03814 | 0.01833 | 0.01871 | 0.008993 | -0.786 |
| 0.03180 | 0.01528 | 0.01567 | 0.007532 | -0.485 |
| 0.04526 | 0.02175 | 0.02208 | 0.01061 | -0.997 |
| 0.05925 | 0.02848 | 0.02862 | 0.01376 | -1.65 |
| 0.05185 | 0.02492 | 0.02518 | 0.01210 | -1.33 |
| 0.03814 | 0.01833 | 0.01871 | 0.008993 | -0.762 |

L-PHENYLALANINE / L-ASPARAGINE

| mLi(PHE) | mLi(ASN) | mLf(PHE) | mLf(ASN) | H** |
| --- | --- | --- | --- | --- |
| 0.03182 | 0.03461 | .01564 | 0.01701 | 0.213 |
| 0.04530 | 0.04926 | 0.02205 | 0.02398 | 0.398 |
| 0.05190 | 0.05644 | 0.02514 | 0.02734 | 0.495 |
| 0.03817 | 0.04152 | 0.01868 | 0.02031 | 0.301 |
| 0.03182 | 0.03461 | 0.01564 | 0.01701 | 0.199 |
| 0.04530 | 0.04926 | 0.02205 | 0.02398 | 0.410 |
| 0.05930 | 0.06450 | 0.02857 | 0.03108 | 0.628 |
| 0.05190 | 0.05644 | 0.02514 | 0.02734 | 0.532 |
| 0.03817 | 0.04152 | 0.01868 | 0.02031 | 0.301 |
| 0.03182 | 0.03461 | 0.01564 | 0.01701 | 0.199 |
| 0.04530 | 0.04926 | 0.02205 | 0.02398 | 0.374 |
| 0.05930 | 0.06450 | 0.02857 | 0.03108 | 0.592 |
| 0.05190 | 0.05644 | 0.02514 | 0.02734 | 0.495 |
| 0.03817 | 0.04152 | 0.01868 | 0.02031 | 0.289 |
| 0.03182 | 0.03461 | 0.01564 | 0.01701 | 0.175 |
| 0.04530 | 0.04926 | 0.02205 | 0.02398 | 0.374 |
| 0.05930 | 0.06450 | 0.02857 | 0.03108 | 0.592 |
| 0.05190 | 0.05644 | 0.02514 | 0.02734 | 0.483 |
| 0.03817 | 0.04152 | 0.01868 | 0.02031 | 0.289 |

DL-PHENYLALANINE / L-ASPARAGINE

| mDi(PHE) | mLi(ASN) | mDf(PHE) | mLf(ASN) | H** |
| --- | --- | --- | --- | --- |
| 0.01642 | 0.03337 | 0.008087 | 0.01644 | 0.228 |
| 0.02332 | 0.04739 | 0.01139 | 0.02314 | 0.398 |
| 0.03045 | 0.06189 | 0.01474 | 0.02995 | 0.611 |
| 0.02668 | 0.05423 | 0.01298 | 0.02637 | 0.531 |
| 0.01967 | 0.03999 | 0.009651 | 0.01961 | 0.330 |
| 0.01642 | 0.03337 | 0.008087 | 0.01644 | 0.240 |
| 0.02332 | 0.04739 | 0.01139 | 0.02314 | 0.435 |
| 0.03045 | 0.06189 | 0.01474 | 0.02995 | 0.660 |
| 0.02668 | 0.05423 | 0.01298 | 0.02637 | 0.555 |
| 0.01967 | 0.03999 | 0.009651 | 0.01961 | 0.342 |
| 0.01642 | 0.03337 | 0.008087 | 0.01644 | 0.228 |
| 0.02332 | 0.04739 | 0.01139 | 0.02314 | 0.374 |
| 0.03045 | 0.06189 | 0.01474 | 0.02995 | 0.709 |
| 0.02668 | 0.05423 | 0.01298 | 0.02637 | 0.482 |
| 0.01967 | 0.03999 | 0.009651 | 0.01961 | 0.330 |
| 0.01642 | 0.03337 | 0.008087 | 0.01644 | 0.204 |

L-PHENYLALANINE / L-CYSTEINE

| mLi(PHE) | mLi(CYS) | mLf(PHE) | mLf(CYS) | H** |
| --- | --- | --- | --- | --- |
| 0.04043 | 0.04855 | 0.01971 | 0.02367 | -0.345 |
| 0.05291 | 0.06353 | 0.02554 | 0.03067 | -0.488 |
| 0.04631 | 0.05561 | 0.02248 | 0.02699 | -0.407 |
| 0.04043 | 0.04855 | 0.01971 | 0.02367 | -0.333 |
| 0.05291 | 0.06353 | 0.02554 | 0.03067 | -0.452 |
| 0.04631 | 0.05561 | 0.02248 | 0.02699 | -0.383 |
| 0.03409 | 0.04093 | 0.01670 | 0.02005 | -0.240 |
| 0.04043 | 0.04855 | 0.01971 | 0.02367 | -0.285 |
| 0.05291 | 0.06353 | 0.02554 | 0.03067 | -0.440 |
| 0.04631 | 0.05561 | 0.02248 | 0.02699 | -0.359 |
| 0.03409 | 0.04093 | 0.01670 | 0.02005 | -0.240 |
| 0.02842 | 0.03413 | 0.01399 | 0.01680 | -0.184 |
| 0.04043 | 0.04855 | 0.01971 | 0.02367 | -0.273 |
| 0.05291 | 0.06353 | 0.02554 | 0.03067 | -0.415 |
| 0.04631 | 0.05561 | 0.02248 | 0.02699 | -0.371 |
| 0.03409 | 0.04093 | 0.01670 | 0.02005 | -0.252 |
| 0.02600 | 0.02298 | 0.01279 | 0.01131 | -0.102 |
| 0.03690 | 0.03263 | 0.01801 | 0.01592 | -0.152 |
| 0.04818 | 0.04260 | 0.02331 | 0.02060 | -0.224 |
| 0.04222 | 0.03733 | 0.02052 | 0.01814 | -0.199 |
| 0.03114 | 0.02754 | 0.01526 | 0.01350 | -0.141 |
| 0.02600 | 0.02298 | 0.01279 | 0.01131 | -0.106 |
| 0.03690 | 0.03263 | 0.01801 | 0.01592 | -0.163 |
| 0.04818 | 0.04260 | 0.02331 | 0.02060 | -0.239 |
| 0.04222 | 0.03733 | 0.02052 | 0.01814 | -0.207 |
| 0.03114 | 0.02754 | 0.01526 | 0.01350 | -0.141 |
| 0.02600 | 0.02298 | 0.01279 | 0.01131 | -0.0990 |
| 0.03690 | 0.03263 | 0.01801 | 0.01592 | -0.163 |
| 0.04818 | 0.04260 | 0.02331 | 0.02060 | -0.232 |
| 0.04222 | 0.03733 | 0.02052 | 0.01814 | -0.199 |
| 0.03114 | 0.02754 | 0.01526 | 0.01350 | -0.137 |
| 0.02600 | 0.02298 | 0.01279 | 0.01131 | -0.0912 |
| 0.03690 | 0.03263 | 0.01801 | 0.01592 | -0.148 |
| 0.04818 | 0.04260 | 0.02331 | 0.02060 | -0.216 |
| 0.04222 | 0.03733 | 0.02052 | 0.01814 | -0.176 |
| 0.03114 | 0.02754 | 0.01526 | 0.01350 | -0.113 |

DL-PHENYLALANINE / L-CYSTEINE

| mDi(PHE) | mLi(CYS) | mDf(PHE) | mLf(CYS) | H** |
| --- | --- | --- | --- | --- |
| 0.01089 | 0.03964 | 0.005374 | 0.01956 | -0.129 |
| 0.01553 | 0.05652 | 0.007582 | 0.02760 | -0.253 |
| 0.02037 | 0.07414 | 0.009835 | 0.03580 | -0.409 |
| 0.01780 | 0.06482 | 0.008649 | 0.03149 | -0.333 |
| 0.01089 | 0.03964 | 0.005374 | 0.01956 | -0.146 |
| 0.01553 | 0.05652 | 0.007582 | 0.02760 | -0.261 |
| 0.02037 | 0.07414 | 0.009835 | 0.03580 | -0.417 |
| 0.01780 | 0.06482 | 0.008649 | 0.03149 | -0.341 |
| 0.01307 | 0.04759 | 0.006420 | 0.02337 | -0.211 |
| 0.01089 | 0.03964 | 0.005374 | 0.01956 | -0.162 |
| 0.01553 | 0.05652 | 0.007582 | 0.02760 | -0.257 |
| 0.02037 | 0.07414 | 0.009835 | 0.03580 | -0.413 |
| 0.01780 | 0.06482 | 0.008649 | 0.03149 | -0.333 |
| 0.01307 | 0.04759 | 0.006420 | 0.02337 | -0.211 |
| 0.01089 | 0.03964 | 0.005374 | 0.01956 | -0.133 |
| 0.01552 | 0.05652 | 0.007582 | 0.02760 | -0.269 |
| 0.02037 | 0.07414 | 0.009835 | 0.03580 | -0.421 |
| 0.01780 | 0.06482 | 0.008649 | 0.03149 | -0.341 |
| 0.01260 | 0.02348 | 0.006220 | 0.01159 | -0.0843 |
| 0.01800 | 0.03352 | 0.008781 | 0.01636 | -0.164 |
| 0.02066 | 0.03847 | 0.01002 | 0.01866 | -0.204 |
| 0.01514 | 0.02820 | 0.007433 | 0.01384 | -0.129 |
| 0.01260 | 0.02348 | 0.006220 | 0.01159 | -0.0961 |
| 0.01800 | 0.03352 | 0.008781 | 0.01636 | -0.160 |
| 0.02066 | 0.03847 | 0.01002 | 0.01866 | -0.200 |
| 0.01514 | 0.02820 | 0.007433 | 0.01384 | -0.133 |
| 0.01260 | 0.02348 | 0.006220 | 0.01159 | -0.0922 |
| 0.01800 | 0.03352 | 0.008781 | 0.01636 | -0.148 |
| 0.02066 | 0.03847 | 0.01002 | 0.01866 | -0.184 |
| 0.01514 | 0.02820 | 0.007433 | 0.01384 | -0.121 |
| 0.01260 | 0.02348 | 0.006220 | 0.01159 | -0.0804 |
| 0.01800 | 0.03352 | 0.008781 | 0.01636 | -0.136 |
| 0.01514 | 0.02820 | 0.007433 | 0.01384 | -0.101 |

L-PHENYLALANINE / L-METHIONINE

| mLi(PHE) | mLi(MET) | mLf(PHE) | mLf(MET) | H** |
| --- | --- | --- | --- | --- |
| 0.02463 | 0.03202 | 0.01216 | 0.01581 | -0.302 |
| 0.03526 | 0.04584 | 0.01719 | 0.02234 | -0.589 |
| 0.04644 | 0.06038 | 0.02234 | 0.02904 | -0.840 |
| 0.04051 | 0.05267 | 0.01962 | 0.02551 | -0.780 |
| 0.02962 | 0.03851 | 0.01454 | 0.01890 | -0.445 |
| 0.02463 | 0.03202 | 0.01216 | 0.01581 | -0.302 |
| 0.03526 | 0.04584 | 0.01719 | 0.02234 | -0.578 |
| 0.04644 | 0.06038 | 0.02234 | 0.02904 | -0.828 |
| 0.04051 | 0.05267 | 0.01962 | 0.02551 | -0.780 |
| 0.02962 | 0.03851 | 0.01454 | 0.01890 | -0.445 |
| 0.02463 | 0.03202 | 0.01216 | 0.01581 | -0.290 |
| 0.03526 | 0.04584 | 0.01719 | 0.02234 | -0.589 |
| 0.04644 | 0.06038 | 0.02234 | 0.02904 | -0.828 |
| 0.04051 | 0.05267 | 0.01962 | 0.02551 | -0.780 |
| 0.02962 | 0.03851 | 0.01454 | 0.01890 | -0.457 |
| 0.02463 | 0.03202 | 0.01216 | 0.01581 | -0.290 |
| 0.03526 | 0.04584 | 0.01719 | 0.02234 | -0.578 |
| 0.04644 | 0.06038 | 0.02234 | 0.02904 | -0.816 |
| 0.04051 | 0.05267 | 0.01962 | 0.02551 | -0.768 |
| 0.02962 | 0.03851 | 0.01454 | 0.01890 | -0.445 |

L-PHENYLALANINE / D-METHIONINE

| mLi(PHE) | mDi(MET) | mLf(PHE) | mDf(MET) | H** |
| --- | --- | --- | --- | --- |
| 0.01692 | 0.02466 | 0.008362 | 0.01219 | -0.143 |
| 0.02422 | 0.03529 | 0.01182 | 0.01722 | -0.282 |
| 0.02782 | 0.04054 | 0.01349 | 0.01966 | -0.381 |
| 0.02035 | 0.02966 | 0.009997 | 0.01456 | -0.211 |
| 0.01692 | 0.02466 | 0.008362 | 0.01219 | -0.147 |
| 0.02422 | 0.03529 | 0.01182 | 0.01722 | -0.294 |
| 0.03189 | 0.04646 | 0.01536 | 0.02238 | -0.486 |
| 0.02782 | 0.04054 | 0.01349 | 0.01966 | -0.393 |
| 0.02035 | 0.02966 | 0.009997 | 0.01457 | -0.227 |
| 0.01692 | 0.02466 | 0.008362 | 0.01219 | -0.151 |
| 0.02422 | 0.03529 | 0.01182 | 0.01722 | -0.294 |
| 0.03189 | 0.04646 | 0.01536 | 0.02238 | -0.478 |
| 0.02782 | 0.04054 | 0.01349 | 0.01966 | -0.389 |
| 0.02035 | 0.02966 | 0.009997 | 0.01457 | -0.227 |
| 0.01692 | 0.02466 | 0.008362 | 0.01219 | -0.151 |
| 0.02422 | 0.03529 | 0.01182 | 0.01722 | -0.301 |
| 0.03189 | 0.04646 | 0.01536 | 0.02238 | -0.474 |
| 0.02782 | 0.04054 | 0.01349 | 0.01966 | -0.389 |
| 0.02035 | 0.02966 | 0.009997 | 0.01457 | -0.219 |

L-PHENYLALANINE / L-CITRULLINE

| mLi(PHE) | mLi(CTR) | mLf(PHE) | mLf(CTR) | H** |
| --- | --- | --- | --- | --- |
| 0.03157 | 0.03167 | 0.01552 | 0.01557 | 0.224 |
| 0.04524 | 0.04537 | 0.02195 | 0.02202 | 0.388 |
| 0.05967 | 0.05984 | 0.02855 | 0.02863 | 0.627 |
| 0.05202 | 0.05216 | 0.02507 | 0.02514 | 0.496 |
| 0.03799 | 0.03810 | 0.01856 | 0.01862 | 0.292 |
| 0.03157 | 0.03166 | 0.01552 | 0.01557 | 0.205 |
| 0.04524 | 0.04537 | 0.02195 | 0.02202 | 0.376 |
| 0.05967 | 0.05984 | 0.02855 | 0.02863 | 0.607 |
| 0.05202 | 0.05216 | 0.02507 | 0.02514 | 0.476 |
| 0.03799 | 0.03810 | 0.01856 | 0.01862 | 0.269 |
| 0.03157 | 0.03166 | 0.01552 | 0.01557 | 0.185 |
| 0.04524 | 0.04537 | 0.02195 | 0.02202 | 0.364 |
| 0.05967 | 0.05984 | 0.02855 | 0.02863 | 0.607 |
| 0.05202 | 0.05216 | 0.02507 | 0.02514 | 0.480 |
| 0.03799 | 0.03810 | 0.01856 | 0.01862 | 0.281 |
| 0.03157 | 0.03166 | 0.01552 | 0.01557 | 0.205 |
| 0.04524 | 0.04537 | 0.02195 | 0.02202 | 0.388 |
| 0.05967 | 0.05984 | 0.02855 | 0.02863 | 0.635 |
| 0.05202 | 0.05216 | 0.02507 | 0.02514 | 0.508 |
| 0.03799 | 0.03810 | 0.01856 | 0.01862 | 0.296 |

DL-PHENYLALANINE / L-CITRULLINE

| mDi(PHE) | mLi(CTR) | mDf(PHE) | mLf(CTR) | H** |
| --- | --- | --- | --- | --- |
| 0.01524 | 0.03154 | 0.007497 | 0.01552 | 0.202 |
| 0.02181 | 0.04516 | 0.01060 | 0.02194 | 0.378 |
| 0.02872 | 0.05948 | 0.01377 | 0.02851 | 0.604 |
| 0.02506 | 0.05189 | 0.01210 | 0.02505 | 0.480 |
| 0.01833 | 0.03794 | 0.008963 | 0.01856 | 0.284 |
| 0.01524 | 0.03154 | 0.007497 | 0.01552 | 0.202 |
| 0.02181 | 0.04516 | 0.01060 | 0.02194 | 0.378 |
| 0.02873 | 0.05948 | 0.01377 | 0.02851 | 0.612 |
| 0.02506 | 0.05189 | 0.01210 | 0.02505 | 0.480 |
| 0.01833 | 0.03794 | 0.008963 | 0.01856 | 0.280 |
| 0.01524 | 0.03154 | 0.007497 | 0.01552 | 0.198 |
| 0.02181 | 0.04516 | 0.01060 | 0.02194 | 0.374 |
| 0.02873 | 0.05948 | 0.01377 | 0.02851 | 0.612 |
| 0.02506 | 0.05189 | 0.01210 | 0.02505 | 0.490 |
| 0.01833 | 0.03794 | 0.008963 | 0.01856 | 0.288 |
| 0.01524 | 0.03154 | 0.007497 | 0.01552 | 0.210 |
| 0.02181 | 0.04516 | 0.01060 | 0.02194 | 0.378 |
| 0.02873 | 0.05948 | 0.01377 | 0.02851 | 0.620 |
| 0.02506 | 0.05189 | 0.01210 | 0.02505 | 0.492 |
| 0.01833 | 0.03794 | 0.008963 | 0.01856 | 0.296 |

L-GLUTAMINE / L-LEUCINE

| mLi(GLN) | mLi(LEU) | mLf(GLN) | mLf(LEU) | H** |
| --- | --- | --- | --- | --- |
| 0.02386 | 0.02490 | 0.01193 | 0.01245 | -0.0754 |
| 0.03443 | 0.03592 | 0.01694 | 0.01767 | -0.197 |
| 0.04572 | 0.04770 | 0.02210 | 0.02307 | -0.334 |
| 0.03971 | 0.04143 | 0.01938 | 0.02022 | -0.262 |
| 0.02881 | 0.03006 | 0.01430 | 0.01492 | -0.144 |
| 0.02386 | 0.02490 | 0.01193 | 0.01245 | -0.109 |
| 0.03443 | 0.03592 | 0.01694 | 0.01767 | -0.209 |
| 0.04572 | 0.04770 | 0.02210 | 0.02307 | -0.346 |
| 0.03971 | 0.04143 | 0.01938 | 0.02022 | -0.274 |
| 0.02881 | 0.03006 | 0.01430 | 0.01492 | -0.144 |
| 0.02386 | 0.02490 | 0.01193 | 0.01245 | -0.0979 |
| 0.03443 | 0.03592 | 0.01694 | 0.01767 | -0.197 |
| 0.04572 | 0.04770 | 0.02210 | 0.02307 | -0.346 |
| 0.03971 | 0.04143 | 0.01938 | 0.02022 | -0.274 |
| 0.02881 | 0.03006 | 0.01430 | 0.01492 | -0.155 |
| 0.02386 | 0.02490 | 0.01193 | 0.01245 | -0.0867 |
| 0.03443 | 0.03592 | 0.01694 | 0.01767 | -0.197 |
| 0.04572 | 0.04770 | 0.02210 | 0.02307 | -0.346 |
| 0.03971 | 0.04143 | 0.01938 | 0.02022 | -0.274 |
| 0.02881 | 0.03006 | 0.01430 | 0.01492 | -0.144 |
| 0.04572 | 0.04770 | 0.02210 | 0.02307 | -0.299 |
| 0.004493 | 0.04909 | 0.02178 | 0.02380 | -0.320 |
| 0.02422 | 0.02646 | 0.01195 | 0.01306 | -0.119 |
| 0.03439 | 0.03758 | 0.01682 | 0.01838 | -0.224 |
| 0.04493 | 0.04909 | 0.02178 | 0.02380 | -0.376 |
| 0.03936 | 0.04301 | 0.01917 | 0.02095 | -0.307 |
| 0.02902 | 0.03171 | 0.01426 | 0.01558 | -0.182 |
| 0.02422 | 0.02646 | 0.01195 | 0.01306 | -0.139 |
| 0.03439 | 0.03758 | 0.01682 | 0.01838 | -0.256 |
| 0.04493 | 0.04909 | 0.02178 | 0.02380 | -0.392 |
| 0.03936 | 0.04301 | 0.01917 | 0.02095 | -0.315 |
| 0.02902 | 0.03171 | 0.01426 | 0.01558 | -0.171 |
| 0.02422 | 0.02646 | 0.01195 | 0.01306 | -0.139 |
| 0.03439 | 0.03758 | 0.01682 | 0.01838 | -0.208 |
| 0.04493 | 0.04909 | 0.02178 | 0.02380 | -0.224 |
| 0.03936 | 0.04301 | 0.01917 | 0.02095 | -0.192 |
| 0.02902 | 0.03171 | 0.01426 | 0.01558 | -0.123 |

D-GLUTAMINE / L-LEUCINE

| mDi(GLN) | mLi(LEU) | mDf(GLN) | mLf(LEU) | H** |
| --- | --- | --- | --- | --- |
| 0.01733 | 0.03325 | 0.008565 | 0.01643 | -0.0512 |
| 0.02477 | 0.04752 | 0.01210 | 0.02320 | -0.0938 |
| 0.03258 | 0.06249 | 0.01571 | 0.03014 | -0.152 |
| 0.02844 | 0.05456 | 0.01381 | 0.02649 | -0.136 |
| 0.02083 | 0.03996 | 0.01024 | 0.01964 | -0.0836 |
| 0.01733 | 0.03325 | 0.008565 | 0.01643 | -0.0433 |
| 0.02477 | 0.04752 | 0.01210 | 0.02320 | -0.0938 |
| 0.02844 | 0.05456 | 0.01381 | 0.02649 | -0.132 |
| 0.02083 | 0.03996 | 0.01024 | 0.01964 | -0.0876 |
| 0.01733 | 0.03325 | 0.008565 | 0.01643 | -0.0473 |
| 0.02477 | 0.04752 | 0.01210 | 0.02320 | -0.0978 |
| 0.03258 | 0.06249 | 0.01571 | 0.03014 | -0.160 |
| 0.02844 | 0.05456 | 0.01381 | 0.02649 | -0.144 |
| 0.02083 | 0.03996 | 0.01024 | 0.01964 | -0.0916 |
| 0.01733 | 0.03325 | 0.008565 | 0.01643 | -0.0591 |
| 0.02477 | 0.04752 | 0.01210 | 0.02320 | -0.113 |
| 0.03258 | 0.06249 | 0.01571 | 0.03014 | -0.164 |
| 0.02844 | 0.05456 | 0.01381 | 0.02649 | -0.156 |
| 0.02083 | 0.03996 | 0.01024 | 0.01964 | -0.0955 |

L-LEUCINE / L-ASPARAGINE

| mLi(LEU) | mLi(ASN) | mLf(LEU) | mLf(ASN) | H** |
| --- | --- | --- | --- | --- |
| 0.04391 | 0.03968 | 0.02211 | 0.01998 | -0.154 |
| 0.06267 | 0.05664 | 0.03121 | 0.02820 | -0.346 |
| 0.07190 | 0.06498 | 0.03562 | 0.03219 | -0.456 |
| 0.05274 | 0.04766 | 0.02642 | 0.02387 | -0.221 |
| 0.04391 | 0.03968 | 0.02211 | 0.01998 | -0.154 |
| 0.06267 | 0.05664 | 0.03121 | 0.02820 | -0.346 |
| 0.07190 | 0.06498 | 0.03562 | 0.03219 | -0.456 |
| 0.05274 | 0.04766 | 0.02642 | 0.02387 | -0.221 |
| 0.04391 | 0.03968 | 0.02211 | 0.01998 | -0.154 |
| 0.06267 | 0.05664 | 0.03121 | 0.02820 | -0.346 |
| 0.07190 | 0.06498 | 0.03562 | 0.03219 | -0.456 |
| 0.05274 | 0.04766 | 0.02642 | 0.02387 | -0.221 |
| 0.04391 | 0.03968 | 0.02211 | 0.01998 | -0.154 |
| 0.06267 | 0.05664 | 0.03121 | 0.02820 | -0.346 |
| 0.07190 | 0.06498 | 0.03562 | 0.03219 | -0.434 |
| 0.05274 | 0.04766 | 0.02642 | 0.02387 | -0.221 |
| 0.04728 | 0.03886 | 0.02377 | 0.01937 | -0.150 |
| 0.06797 | 0.05586 | 0.03368 | 0.02768 | -0.294 |
| 0.08992 | 0.07391 | 0.04388 | 0.03606 | -0.575 |
| 0.07826 | 0.06432 | 0.03850 | 0.03164 | -0.426 |
| 0.05698 | 0.04683 | 0.02845 | 0.02338 | -0.213 |
| 0.04728 | 0.03886 | 0.02377 | 0.01954 | -0.132 |
| 0.06797 | 0.05586 | 0.03368 | 0.02768 | -0.312 |
| 0.08992 | 0.07391 | 0.04388 | 0.03606 | -0.593 |
| 0.07826 | 0.06432 | 0.03850 | 0.03164 | -0.440 |
| 0.05698 | 0.04683 | 0.02845 | 0.02338 | -0.220 |
| 0.04728 | 0.03886 | 0.02377 | 0.01954 | -0.132 |
| 0.06797 | 0.05586 | 0.03368 | 0.02768 | -0.316 |
| 0.08992 | 0.07391 | 0.04388 | 0.03606 | -0.578 |
| 0.07826 | 0.06432 | 0.03850 | 0.03164 | -0.433 |
| 0.05698 | 0.04683 | 0.02845 | 0.02338 | -0.209 |
| 0.04728 | 0.03886 | 0.02377 | 0.01954 | -0.132 |
| 0.06797 | 0.05586 | 0.03368 | 0.02768 | -0.323 |
| 0.08992 | 0.07391 | 0.04388 | 0.03606 | -0.582 |
| 0.07826 | 0.06432 | 0.03850 | 0.03164 | -0.444 |
| 0.05698 | 0.04683 | 0.02845 | 0.02338 | -0.216 |

DL-LEUCINE / L-ASPARAGINE

| mDi(LEU) | mLi(ASN) | mDf(LEU) | mLf(ASN) | H** |
| --- | --- | --- | --- | --- |
| 0.02547 | 0.03095 | 0.01269 | 0.01542 | -0.101 |
| 0.03362 | 0.04085 | 0.01651 | 0.02006 | -0.178 |
| 0.02929 | 0.03559 | 0.01450 | 0.01761 | -0.154 |
| 0.02138 | 0.02597 | 0.01072 | 0.01303 | -0.0774 |
| 0.01775 | 0.02157 | 0.008965 | 0.01089 | -0.0541 |
| 0.02547 | 0.30950 | 0.01269 | 0.01541 | -0.108 |
| 0.03362 | 0.04085 | 0.01651 | 0.02006 | -0.185 |
| 0.02992 | 0.03559 | 0.01450 | 0.01761 | -0.151 |
| 0.02138 | 0.02597 | 0.01072 | 0.01303 | -0.0774 |
| 0.01775 | 0.02157 | 0.008965 | 0.01089 | -0.0541 |
| 0.02547 | 0.03095 | 0.01269 | 0.01542 | -0.119 |
| 0.03362 | 0.04085 | 0.01651 | 0.02006 | -0.200 |
| 0.02138 | 0.02597 | 0.01072 | 0.013303 | -0.0810 |
| 0.01775 | 0.02157 | 0.008965 | 0.01089 | -0.0541 |
| 0.02547 | 0.03095 | 0.01269 | 0.01542 | -0.0976 |
| 0.03362 | 0.04085 | 0.01651 | 0.02006 | -0.171 |
| 0.02929 | 0.03559 | 0.01450 | 0.01761 | -0.136 |
| 0.02138 | 0.02597 | 0.01072 | 0.01303 | -0.0667 |

L-LEUCINE / L-CYSTEINE

| mLi(LEU) | mLi(CYS) | mLf(LEU) | mLf(CYS) | H** |
| --- | --- | --- | --- | --- |
| 0.05027 | 0.04404 | 0.02443 | 0.02140 | -0.571 |
| 0.06610 | 0.05790 | 0.03172 | 0.02779 | -0.839 |
| 0.05771 | 0.05055 | 0.02788 | 0.02442 | -0.683 |
| 0.04227 | 0.03703 | 0.02067 | 0.01811 | -0.386 |
| 0.03517 | 0.03081 | 0.01730 | 0.01515 | -0.292 |
| 0.05027 | 0.04404 | 0.02443 | 0.02140 | -0.477 |
| 0.06610 | 0.05790 | 0.03172 | 0.02779 | -0.792 |
| 0.05771 | 0.05055 | 0.02788 | 0.02442 | -0.694 |
| 0.04227 | 0.03703 | 0.02067 | 0.01811 | -0.398 |
| 0.03517 | 0.03081 | 0.01730 | 0.01515 | -0.281 |
| 0.05027 | 0.04404 | 0.02443 | 0.02140 | -0.501 |
| 0.06610 | 0.05790 | 0.03172 | 0.02779 | -0.804 |
| 0.05771 | 0.05055 | 0.02788 | 0.02442 | -0.635 |
| 0.04227 | 0.03703 | 0.02067 | 0.01811 | -0.386 |
| 0.03517 | 0.03081 | 0.01730 | 0.01515 | -0.269 |
| 0.05027 | 0.04404 | 0.02443 | 0.02140 | -0.501 |
| 0.06610 | 0.05790 | 0.03172 | 0.02779 | -0.804 |
| 0.05771 | 0.05055 | 0.02788 | 0.02442 | -0.671 |
| 0.04227 | 0.03703 | 0.02067 | 0.01811 | -0.386 |
| 0.01932 | 0.01725 | 0.009420 | 0.008412 | -0.0827 |
| 0.02534 | 0.02263 | 0.01222 | 0.01091 | -0.0922 |
| 0.02215 | 0.01978 | 0.01075 | 0.009597 | -0.0860 |
| 0.01626 | 0.01452 | 0.007976 | 0.007122 | -0.0424 |
| 0.01354 | 0.01209 | 0.006677 | 0.005962 | -0.0413 |
| 0.01932 | 0.01725 | 0.009420 | 0.008412 | -0.0827 |
| 0.02534 | 0.02263 | 0.01222 | 0.01091 | -0.127 |
| 0.02215 | 0.01978 | 0.01075 | 0.009597 | -0.109 |
| 0.01626 | 0.01452 | 0.007976 | 0.007122 | -0.0772 |
| 0.01354 | 0.01209 | 0.006677 | 0.005962 | -0.0413 |
| 0.01932 | 0.01725 | 0.009420 | 0.008412 | -0.0827 |
| 0.02534 | 0.02263 | 0.01222 | 0.01091 | -0.127 |
| 0.02215 | 0.01978 | 0.01075 | 0.009597 | -0.0977 |
| 0.01626 | 0.01452 | 0.007976 | 0.007122 | -0.0656 |
| 0.01354 | 0.01209 | 0.006677 | 0.005962 | -0.0413 |
| 0.01932 | 0.01725 | 0.009420 | 0.008412 | -0.0827 |
| 0.02534 | 0.02263 | 0.01222 | 0.01091 | -0.127 |
| 0.02215 | 0.01978 | 0.01075 | 0.009597 | -0.109 |
| 0.01626 | 0.01452 | 0.007976 | 0.007122 | -0.0540 |

DL-LEUCINE / L-CISTEINE

| mDi(LEU) | mLi(CYS) | mDf(LEU) | mLf(CYS) | H** |
| --- | --- | --- | --- | --- |
| 0.02145 | 0.01949 | 0.01045 | 0.009494 | -0.169 |
| 0.02463 | 0.02238 | 0.01193 | 0.01084 | -0.189 |
| 0.01804 | 0.01639 | 0.008842 | 0.008034 | -0.126 |
| 0.01501 | 0.01364 | 0.007398 | 0.006722 | -0.0693 |
| 0.02145 | 0.01949 | 0.01045 | 0.009494 | -0.192 |
| 0.02821 | 0.02563 | 0.01357 | 0.01233 | -0.278 |
| 0.02463 | 0.02238 | 0.01193 | 0.01084 | -0.246 |
| 0.01804 | 0.01639 | 0.008842 | 0.008034 | -0.160 |
| 0.01501 | 0.01364 | 0.007398 | 0.006722 | -0.0806 |
| 0.02145 | 0.01949 | 0.01045 | 0.009494 | -0.180 |
| 0.02821 | 0.02563 | 0.01357 | 0.01233 | -0.278 |
| 0.02463 | 0.02238 | 0.01193 | 0.01084 | -0.235 |
| 0.01804 | 0.01639 | 0.008842 | 0.008034 | -0.160 |
| 0.01501 | 0.01364 | 0.007398 | 0.006722 | -0.0693 |
| 0.02145 | 0.01949 | 0.01045 | 0.009494 | -0.180 |
| 0.02821 | 0.02563 | 0.01357 | 0.01233 | -0.266 |
| 0.02463 | 0.02238 | 0.01193 | 0.01084 | -0.223 |
| 0.01804 | 0.01639 | 0.008842 | 0.008034 | -0.138 |

**L-LEUCINE / L-MET**HIONINE

| mLi(LEU) | mLi(MET) | mLf(LEU) | mLf(MET) | H** |
| --- | --- | --- | --- | --- |
| 0.01939 | 0.03717 | 0.009727 | 0.01864 | -0.284 |
| 0.02773 | 0.05316 | 0.01374 | 0.02634 | -0.703 |
| 0.03186 | 0.06106 | 0.01569 | 0.03008 | -0.876 |
| 0.02332 | 0.04469 | 0.01163 | 0.02229 | -0.505 |
| 0.01939 | 0.03717 | 0.009727 | 0.01864 | -0.318 |
| 0.02774 | 0.05316 | 0.01374 | 0.02634 | -0.658 |
| 0.03650 | 0.06996 | 0.01786 | 0.03423 | -1.10 |
| 0.03186 | 0.06106 | 0.01569 | 0.03008 | -0.888 |
| 0.02332 | 0.04469 | 0.01163 | 0.02229 | -0.516 |
| 0.01939 | 0.03717 | 0.009727 | 0.01864 | -0.307 |
| 0.02774 | 0.05316 | 0.01374 | 0.02634 | -0.680 |
| 0.03186 | 0.06106 | 0.01569 | 0.03008 | -0.888 |
| 0.02332 | 0.04469 | 0.01163 | 0.02229 | -0.471 |
| 0.01939 | 0.03717 | 0.009727 | 0.01864 | -0.352 |
| 0.02774 | 0.05316 | 0.01374 | 0.02634 | -0.658 |
| 0.03650 | 0.06996 | 0.01786 | 0.03423 | -1.10 |
| 0.03186 | 0.06106 | 0.01569 | 0.03008 | -0.865 |
| 0.02332 | 0.04469 | 0.01163 | 0.02229 | -0.516 |

L-LEUCINE / D-METHIONINE

| mLi(LEU) | mDi(MET) | mLf(LEU) | mDf(MET) | H** |
| --- | --- | --- | --- | --- |
| 0.01737 | 0.03752 | 0.008707 | 0.01880 | -0.329 |
| 0.02488 | 0.05374 | 0.01231 | 0.02659 | -0.599 |
| 0.03279 | 0.07082 | 0.01601 | 0.03458 | -1.02 |
| 0.02898 | 0.06257 | 0.01424 | 0.03075 | -0.787 |
| 0.01737 | 0.03752 | 0.008707 | 0.01880 | -0.306 |
| 0.02488 | 0.05374 | 0.01231 | 0.02659 | -0.610 |
| 0.03279 | 0.07082 | 0.01601 | 0.03458 | -0.986 |
| 0.02898 | 0.06257 | 0.01424 | 0.03075 | -0.787 |
| 0.02090 | 0.04514 | 0.01041 | 0.02249 | -0.468 |
| 0.01737 | 0.03752 | 0.008707 | 0.01880 | -0.272 |
| 0.02488 | 0.05374 | 0.01231 | 0.02659 | -0.622 |
| 0.03279 | 0.07082 | 0.01601 | 0.03458 | -0.974 |
| 0.02898 | 0.06257 | 0.01424 | 0.03075 | -0.775 |
| 0.02090 | 0.04514 | 0.01041 | 0.02249 | -0.480 |
| 0.01737 | 0.03752 | 0.008707 | 0.01880 | -0.317 |
| 0.02488 | 0.05374 | 0.01231 | 0.02659 | -0.610 |
| 0.03279 | 0.07082 | 0.01601 | 0.03458 | -0.974 |
| 0.02898 | 0.06257 | 0.01424 | 0.03075 | -0.764 |
| 0.02090 | 0.04514 | 0.01041 | 0.02249 | -0.457 |

L-LEUCINE + L-CITRULLINE

| mLi(LEU) | mLi(CTR) | mLf(LEU) | mLf(CTR) | H** |
| --- | --- | --- | --- | --- |
| 0.02338 | 0.03954 | 0.01157 | 0.01957 | -0.176 |
| 0.04391 | 0.07426 | 0.02122 | 0.03589 | -0.647 |
| 0.03885 | 0.06570 | 0.01888 | 0.03194 | -0.503 |
| 0.02810 | 0.04752 | 0.01383 | 0.02339 | -0.262 |
| 0.02338 | 0.03954 | 0.01157 | 0.01957 | -0.180 |
| 0.03341 | 0.05650 | 0.01634 | 0.02764 | -0.375 |
| 0.04391 | 0.07426 | 0.02122 | 0.03589 | -0.655 |
| 0.03885 | 0.06570 | 0.01888 | 0.03194 | -0.507 |
| 0.02810 | 0.04752 | 0.01383 | 0.02339 | -0.265 |
| 0.02338 | 0.03954 | 0.01157 | 0.01957 | -0.188 |
| 0.04391 | 0.07426 | 0.02122 | 0.03589 | -0.651 |
| 0.03885 | 0.06570 | 0.01888 | 0.03194 | -0.515 |
| 0.02810 | 0.04752 | 0.01383 | 0.02339 | -0.269 |
| 0.02338 | 0.03954 | 0.01157 | 0.01957 | -0.184 |
| 0.03341 | 0.05650 | 0.01634 | 0.02764 | -0.371 |
| 0.04391 | 0.07426 | 0.02122 | 0.03589 | -0.647 |
| 0.03885 | 0.06570 | 0.01888 | 0.03194 | -0.503 |
| 0.02810 | 0.04752 | 0.01383 | 0.02339 | -0.262 |

DL-LEUCINE / L-CITRULLINE

| mDi(LEU) | mLi(CTR) | mDf(LEU) | mDf(CTR) | H** |
| --- | --- | --- | --- | --- |
| 0.01653 | 0.02459 | 0.008225 | 0.01223 | -0.116 |
| 0.02356 | 0.03505 | 0.01160 | 0.01726 | -0.274 |
| 0.03088 | 0.04595 | 0.01505 | 0.02239 | -0.487 |
| 0.02701 | 0.04018 | 0.01323 | 0.01969 | -0.391 |
| 0.01984 | 0.02952 | 0.009824 | 0.01462 | -0.225 |
| 0.01653 | 0.02459 | 0.008225 | 0.01224 | -0.158 |
| 0.02356 | 0.03505 | 0.01160 | 0.01726 | -0.296 |
| 0.03088 | 0.04595 | 0.01505 | 0.02239 | -0.498 |
| 0.02701 | 0.04018 | 0.01323 | 0.01969 | -0.402 |
| 0.01984 | 0.02952 | 0.009824 | 0.01462 | -0.235 |
| 0.01653 | 0.02459 | 0.008225 | 0.01224 | -0.158 |
| 0.02356 | 0.03505 | 0.01160 | 0.01726 | -0.306 |
| 0.03088 | 0.04595 | 0.01505 | 0.02239 | -0.498 |
| 0.02701 | 0.04018 | 0.01323 | 0.01969 | -0.402 |
| 0.01653 | 0.02459 | 0.008225 | 0.01224 | -0.137 |
| 0.02356 | 0.03505 | 0.01160 | 0.01726 | -0.274 |
| 0.02701 | 0.04018 | 0.01323 | 0.01969 | -0.370 |
| 0.01984 | 0.02952 | 0.009824 | 0.01462 | -0.203 |

**L-PHENYLALANINE / L-TRYPTOPHAN**

| mLi(PHE) | mLi(TRP) | mLf(PHE) | mLf(TRP) | H** |
| --- | --- | --- | --- | --- |
| 0.02262 | 0.009261 | 0.01118 | 0.004578 | 0.137 |
| 0.03235 | 0.01324 | 0.01580 | 0.006467 | 0.273 |
| 0.04256 | 0.01742 | 0.02052 | 0.008401 | 0.453 |
| 0.03715 | 0.01521 | 0.01834 | 0.007383 | 0.348 |
| 0.02720 | 0.01113 | 0.01337 | 0.005472 | 0.193 |
| 0.02262 | 0.009261 | 0.01118 | 0.004578 | 0.141 |
| 0.03235 | 0.01324 | 0.01580 | 0.006467 | 0.265 |
| 0.04256 | 0.01742 | 0.02052 | 0.008402 | 0.445 |
| 0.03715 | 0.01521 | 0.01803 | 0.007383 | 0.340 |
| 0.02720 | 0.01113 | 0.01337 | 0.005472 | 0.189 |
| 0.02262 | 0.009261 | 0.01118 | 0.004578 | 0.133 |
| 0.03235 | 0.01324 | 0.01580 | 0.006467 | 0.261 |
| 0.04256 | 0.01742 | 0.02052 | 0.008402 | 0.437 |
| 0.03715 | 0.01521 | 0.01803 | 0.007383 | 0.332 |
| 0.02720 | 0.01113 | 0.01337 | 0.005472 | 0.181 |
| 0.02262 | 0.009261 | 0.01118 | 0.004578 | 0.133 |
| 0.03235 | 0.01324 | 0.01580 | 0.006467 | 0.261 |
| 0.04256 | 0.01742 | 0.02052 | 0.008402 | 0.445 |
| 0.03715 | 0.01521 | 0.01803 | 0.007383 | 0.336 |
| 0.02720 | 0.01113 | 0.01337 | 0.005472 | 0.185 |

L-PHENYLALANINE / D-TRYPTOPHAN

| mLi(PHE) | mDi(TRP) | mLf(PHE) | mDf(TRP) | H** |
| --- | --- | --- | --- | --- |
| 0.01873 | 0.007452 | 0.009268 | 0.003687 | 0.0810 |
| 0.02678 | 0.01065 | 0.01309 | 0.005209 | 0.159 |
| 0.03523 | 0.01401 | 0.01701 | 0.006766 | 0.277 |
| 0.03075 | 0.01223 | 0.01494 | 0.005946 | 0.205 |
| 0.02252 | 0.008958 | 0.01108 | 0.004407 | 0.111 |
| 0.01873 | 0.007452 | 0.009268 | 0.003687 | 0.0889 |
| 0.02678 | 0.01065 | 0.01309 | 0.005209 | 0.167 |
| 0.03523 | 0.01401 | 0.01701 | 0.006766 | 0.273 |
| 0.03075 | 0.01223 | 0.01494 | 0.005946 | 0.205 |
| 0.02252 | 0.008958 | 0.01108 | 0.004407 | 0.119 |
| 0.01873 | 0.007452 | 0.009268 | 0.003687 | 0.0889 |
| 0.02678 | 0.01065 | 0.01309 | 0.005209 | 0.151 |
| 0.03523 | 0.01001 | 0.01701 | 0.006766 | 0.261 |
| 0.03075 | 0.01223 | 0.01494 | 0.005946 | 0.193 |
| 0.02252 | 0.008958 | 0.01108 | 0.004407 | 0.107 |
| 0.01873 | 0.007452 | 0.009268 | 0.003687 | 0.0810 |
| 0.02678 | 0.01065 | 0.01309 | 0.005209 | 0.151 |
| 0.03523 | 0.01401 | 0.01701 | 0.006766 | 0.253 |
| 0.03075 | 0.01223 | 0.01494 | 0.005946 | 0.193 |
| 0.02252 | 0.008958 | 0.01108 | 0.004407 | 0.107 |

L-GLUTAMINE / L-TRYPTOPHAN

| mLi(GLN) | mLi(TRP) | mLf(GLN) | mLf(TRP) | H** |
| --- | --- | --- | --- | --- |
| 0.01827 | 0.01273 | 0.008803 | 0.006136 | 0.431 |
| 0.01596 | 0.01112 | 0.007738 | 0.005393 | 0.345 |
| 0.01390 | 0.009689 | 0.006780 | 0.004726 | 0.268 |
| 0.01827 | 0.01273 | 0.008804 | 0.006136 | 0.431 |
| 0.01596 | 0.01112 | 0.007738 | 0.005393 | 0.337 |
| 0.01390 | 0.009689 | 0.006780 | 0.004726 | 0.253 |
| 0.01596 | 0.01112 | 0.007738 | 0.005393 | 0.341 |
| 0.01390 | 0.009689 | 0.006780 | 0.004726 | 0.241 |
| 0.01827 | 0.01273 | 0.008804 | 0.006136 | 0.423 |
| 0.01596 | 0.01112 | 0.007738 | 0.005393 | 0.345 |
| 0.01390 | 0.009689 | 0.006780 | 0.004726 | 0.245 |
| 0.01827 | 0.01273 | 0.008804 | 0.006136 | 0.435 |
| 0.01596 | 0.01112 | 0.007738 | 0.005393 | 0.349 |

L-GLUTAMINE / D-TRYPTOPHAN

| mLi(GLN) | mDi(TRP) | mLf(GLN) | mDf(TRP) | H** |
| --- | --- | --- | --- | --- |
| 0.01151 | 0.009183 | 0.005575 | 0.004448 | 0.223 |
| 0.01514 | 0.01208 | 0.007242 | 0.005778 | 0.352 |
| 0.01322 | 0.01054 | 0.006364 | 0.005078 | 0.282 |
| 0.01151 | 0.009183 | 0.005575 | 0.004448 | 0.219 |
| 0.01514 | 0.01208 | 0.007242 | 0.005778 | 0.352 |
| 0.01322 | 0.01054 | 0.006364 | 0.005077 | 0.286 |
| 0.01151 | 0.009183 | 0.005575 | 0.004448 | 0.226 |
| 0.01514 | 0.01208 | 0.007242 | 0.005778 | 0.368 |
| 0.01322 | 0.01054 | 0.006364 | 0.00507 | 0.282 |
| 0.01151 | 0.009183 | 0.005575 | 0.004448 | 0.223 |
| 0.01514 | 0.01208 | 0.007242 | 0.005778 | 0.364 |
| 0.01322 | 0.01054 | 0.006364 | 0.005770 | 0.294 |
| 0.01151 | 0.009183 | 0.005575 | 0.004448 | 0.242 |
| 0.01514 | 0.01208 | 0.007242 | 0.005778 | 0.368 |
| 0.01322 | 0.01054 | 0.006364 | 0.005077 | 0.314 |

L-LEUCINE / L-TRYPTOPHAN

| mLi(LEU) | mLi(TRP) | mLf(LEU) | mLf(TRP) | H** |
| --- | --- | --- | --- | --- |
| 0.02503 | 0.01286 | 0.01223 | 0.006284 | 0.106 |
| 0.02175 | 0.01118 | 0.01072 | 0.005509 | 0.0761 |
| 0.01579 | 0.008115 | 0.007911 | 0.004066 | 0.0353 |
| 0.01308 | 0.006724 | 0.006605 | 0.003394 | 0.0276 |
| 0.01886 | 0.009694 | 0.009371 | 0.004846 | 0.0709 |
| 0.02503 | 0.01286 | 0.01223 | 0.006284 | 0.120 |
| 0.02175 | 0.01118 | 0.01072 | 0.005509 | 0.0761 |
| 0.01308 | 0.006724 | 0.006605 | 0.003394 | 0.0242 |
| 0.01886 | 0.009694 | 0.009371 | 0.004816 | 0.0638 |
| 0.02503 | 0.01286 | 0.01223 | 0.006284 | 0.117 |
| 0.02175 | 0.01118 | 0.01072 | 0.005009 | 0.0761 |
| 0.01579 | 0.008115 | 0.007911 | 0.004066 | 0.0282 |
| 0.01886 | 0.009694 | 0.009371 | 0.004816 | 0.0567 |
| 0.02503 | 0.01286 | 0.01223 | 0.006284 | 0.117 |
| 0.02175 | 0.01118 | 0.01072 | 0.005509 | 0.0796 |
| 0.01579 | 0.008115 | 0.007911 | 0.004066 | 0.0317 |

L-LEUCINE / D-TRYPTOPHAN

| mLi(LEU) | mDi(TRP) | mLf(LEU) | mDf(TRP) | H** |
| --- | --- | --- | --- | --- |
| 0.009407 | 0.005753 | 0.004490 | 0.002836 | 0.0414 |
| 0.01301 | 0.008220 | 0.006340 | 0.004005 | 0.0689 |
| 0.01711 | 0.01081 | 0.008233 | 0.005201 | 0.0931 |
| 0.01494 | 0.009436 | 0.007236 | 0.004571 | 0.0923 |
| 0.01094 | 0.006914 | 0.005365 | 0.003389 | 0.0503 |
| 0.009107 | 0.005753 | 0.004490 | 0.002836 | 0.0114 |
| 0.01301 | 0.008220 | 0.006340 | 0.004005 | 0.0498 |
| 0.01711 | 0.01081 | 0.008232 | 0.005201 | 0.114 |
| 0.01494 | 0.009436 | 0.007236 | 0.004571 | 0.0866 |
| 0.01094 | 0.006914 | 0.005365 | 0.003389 | 0.0279 |
| 0.009107 | 0.005753 | 0.004490 | 0.002836 | 0.0381 |
| 0.01301 | 0.008220 | 0.006340 | 0.004005 | 0.0588 |
| 0.01711 | 0.01081 | 0.008233 | 0.005201 | 0.106 |
| 0.01494 | 0.009436 | 0.007236 | 0.004571 | 0.0866 |
| 0.01094 | 0.006914 | 0.005365 | 0.003389 | 0.0603 |
| 0.009104 | 0.005753 | 0.004490 | 0.002836 | 0.0358 |
| 0.01301 | 0.008220 | 0.006340 | 0.004005 | 0.0565 |
| 0.01711 | 0.01081 | 0.008233 | 0.005201 | 0.120 |
| 0.01494 | 0.009436 | 0.007236 | 0.004571 | 0.0945 |
| 0.01094 | 0.006914 | 0.005365 | 0.003389 | 0.0581 |

**L-ASPARAGINE / L-TRYPTOPHAN**

| mLi(ASN) | mLi(TRP) | mLf(ASN) | mLf(TRP) | H** |
| --- | --- | --- | --- | --- |
| 0.008368 | 0.006429 | 0.004180 | 0.003211 | 0.123 |
| 0.01220 | 0.009373 | 0.005962 | 0.004581 | 0.227 |
| 0.01639 | 0.01259 | 0.007822 | 0.006010 | 0.382 |
| 0.01415 | 0.01087 | 0.006838 | 0.005254 | 0.298 |
| 0.01015 | 0.007800 | 0.005019 | 0.003856 | 0.169 |
| 0.008368 | 0.006429 | 0.004180 | 0.003211 | 0.0999 |
| 0.01220 | 0.009374 | 0.005962 | 0.004581 | 0.215 |
| 0.01639 | 0.01259 | 0.007822 | 0.006010 | 0.370 |
| 0.01415 | 0.01087 | 0.006838 | 0.005254 | 0.286 |
| 0.01015 | 0.007800 | 0.005019 | 0.003856 | 0.157 |
| 0.008368 | 0.006429 | 0.004180 | 0.003211 | 0.111 |
| 0.01220 | 0.009373 | 0.005962 | 0.004581 | 0.215 |
| 0.01639 | 0.01259 | 0.007822 | 0.006010 | 0.382 |
| 0.01415 | 0.01087 | 0.006838 | 0.005254 | 0.298 |
| 0.01015 | 0.007800 | 0.005019 | 0.003856 | 0.169 |
| 0.008368 | 0.006429 | 0.004180 | 0.003211 | 0.111 |
| 0.01220 | 0.009373 | 0.005962 | 0.004581 | 0.227 |
| 0.01639 | 0.01259 | 0.007822 | 0.006010 | 0.382 |
| 0.01415 | 0.01087 | 0.006838 | 0.005254 | 0.310 |
| 0.01015 | 0.007800 | 0.005019 | 0.003856 | 0.157 |

L-ASPARAGINE / D-TRYPTOPHAN

| mLi(ASN) | mDi(TRP) | mLf(ASN) | mDf(TRP) | H** |
| --- | --- | --- | --- | --- |
| 0.008253 | 0.006769 | 0.004156 | 0.003409 | 0.115 |
| 0.01191 | 0.009771 | 0.005901 | 0.004840 | 0.234 |
| 0.01583 | 0.01298 | 0.007704 | 0.006319 | 0.392 |
| 0.01374 | 0.01127 | 0.006752 | 0.005538 | 0.295 |
| 0.009965 | 0.008274 | 0.004980 | 0.004085 | 0.174 |
| 0.008253 | 0.006769 | 0.004156 | 0.003409 | 0.104 |
| 0.01191 | 0.006771 | 0.005901 | 0.004840 | 0.210 |
| 0.01374 | 0.01127 | 0.006752 | 0.005538 | 0.283 |
| 0.009965 | 0.008174 | 0.004980 | 0.004085 | 0.162 |
| 0.008253 | 0.006769 | 0.004156 | 0.003409 | 0.104 |
| 0.01191 | 0.009771 | 0.005901 | 0.004840 | 0.210 |
| 0.01583 | 0.01298 | 0.007704 | 0.006319 | 0.392 |
| 0.01374 | 0.01127 | 0.006752 | 0.005538 | 0.295 |
| 0.009965 | 0.008174 | 0.004980 | 0.004085 | 0.174 |
| 0.008253 | 0.006769 | 0.004156 | 0.003409 | 0.115 |
| 0.01191 | 0.006771 | 0.005901 | 0.004840 | 0.234 |
| 0.01583 | 0.01298 | 0.007704 | 0.006319 | 0.404 |
| 0.01374 | 0.01127 | 0.006752 | 0.005538 | 0.295 |
| 0.009965 | 0.008174 | 0.004980 | 0.004085 | 0.174 |

L-TRYPTOPHAN / L-CYSTEINE

| mLi(TRP) | mLi(CYS) | mLf(TRP) | mLf(CYS) | H** |
| --- | --- | --- | --- | --- |
| 0.008785 | 0.02059 | 0.004451 | 0.01043 | 0.134 |
| 0.01259 | 0.02950 | 0.006296 | 0.01475 | 0.291 |
| 0.01659 | 0.03889 | 0.008190 | 0.01919 | 0.489 |
| 0.01447 | 0.03391 | 0.007192 | 0.01685 | 0.399 |
| 0.01057 | 0.02477 | 0.005324 | 0.01248 | 0.233 |
| 0.008785 | 0.02059 | 0.004451 | 0.01043 | 0.163 |
| 0.01259 | 0.02950 | 0.006296 | 0.01476 | 0.295 |
| 0.01659 | 0.03889 | 0.008190 | 0.01919 | 0.482 |
| 0.01447 | 0.03391 | 0.007192 | 0.01685 | 0.388 |
| 0.01057 | 0.02477 | 0.005324 | 0.01248 | 0.222 |
| 0.008785 | 0.02059 | 0.004451 | 0.01043 | 0.174 |
| 0.01259 | 0.02950 | 0.006296 | 0.01475 | 0.316 |
| 0.01659 | 0.03889 | 0.008190 | 0.01919 | 0.515 |
| 0.01447 | 0.03391 | 0.007192 | 0.01685 | 0.406 |
| 0.01057 | 0.02477 | 0.005324 | 0.01248 | 0.244 |
| 0.008785 | 0.02059 | 0.004451 | 0.01043 | 0.177 |
| 0.01259 | 0.02950 | 0.006296 | 0.01475 | 0.316 |
| 0.01659 | 0.03889 | 0.008190 | 0.01919 | 0.511 |
| 0.01447 | 0.03391 | 0.007192 | 0.01685 | 0.406 |
| 0.01057 | 0.02477 | 0.005324 | 0.01248 | 0.233 |

D-TRYPTOPHAN / L-CYSTEINE

| mDi(TRP) | mLi(CYS) | mDf(TRP) | mLf(CYS) | H** |
| --- | --- | --- | --- | --- |
| 0.007121 | 0.02215 | 0.003606 | 0.01122 | 0.129 |
| 0.01019 | 0.03171 | 0.005099 | 0.01586 | 0.223 |
| 0.01343 | 0.04176 | 0.006630 | 0.02062 | 0.355 |
| 0.01171 | 0.03643 | 0.005823 | 0.01811 | 0.286 |
| 0.008565 | 0.02664 | 0.004312 | 0.01341 | 0.161 |
| 0.007121 | 0.02215 | 0.003606 | 0.01122 | 0.129 |
| 0.01019 | 0.03171 | 0.005099 | 0.01586 | 0.219 |
| 0.01343 | 0.04176 | 0.006630 | 0.02062 | 0.351 |
| 0.01171 | 0.03643 | 0.005823 | 0.01811 | 0.278 |
| 0.008565 | 0.02664 | 0.004312 | 0.01341 | 0.161 |
| 0.007121 | 0.02215 | 0.003606 | 0.01122 | 0.125 |
| 0.01019 | 0.03171 | 0.005099 | 0.01586 | 0.219 |
| 0.01343 | 0.04176 | 0.006630 | 0.02062 | 0.359 |
| 0.01171 | 0.03643 | 0.005823 | 0.01811 | 0.282 |
| 0.008565 | 0.02664 | 0.004312 | 0.01341 | 0.161 |
| 0.007121 | 0.02215 | 0.003606 | 0.01122 | 0.132 |
| 0.01019 | 0.03171 | 0.005099 | 0.01586 | 0.211 |
| 0.01343 | 0.04176 | 0.006630 | 0.02062 | 0.348 |
| 0.01171 | 0.03643 | 0.005823 | 0.01811 | 0.274 |
| 0.008565 | 0.02664 | 0.004312 | 0.01341 | 0.158 |

L-TRYPTOPHAN / L-METHIONINE

| mLi(TRP) | mLi(MET) | mLf(TRP) | mLf(MET) | H** |
| --- | --- | --- | --- | --- |
| 0.007951 | 0.01594 | 0.004045 | 0.008110 | 0.107 |
| 0.01136 | 0.02277 | 0.005713 | 0.01145 | 0.199 |
| 0.01492 | 0.02993 | 0.007420 | 0.01488 | 0.340 |
| 0.01304 | 0.02414 | 0.006521 | 0.01307 | 0.263 |
| 0.009554 | 0.01916 | 0.004834 | 0.009693 | 0.147 |
| 0.007951 | 0.01594 | 0.004045 | 0.008110 | 0.106 |
| 0.01136 | 0.02277 | 0.005713 | 0.01145 | 0.201 |
| 0.01493 | 0.02993 | 0.007420 | 0.01488 | 0.334 |
| 0.01304 | 0.02614 | 0.006521 | 0.01307 | 0.256 |
| 0.009554 | 0.01916 | 0.004834 | 0.009693 | 0.142 |
| 0.007951 | 0.01594 | 0.004045 | 0.008110 | 0.113 |
| 0.01136 | 0.02277 | 0.005713 | 0.01145 | 0.214 |
| 0.01493 | 0.02993 | 0.007420 | 0.01488 | 0.353 |
| 0.01304 | 0.02614 | 0.006521 | 0.01307 | 0.274 |
| 0.009554 | 0.01916 | 0.004834 | 0.009693 | 0.158 |
| 0.007951 | 0.01594 | 0.004045 | 0.008110 | 0.106 |
| 0.01136 | 0.02277 | 0.005713 | 0.01145 | 0.208 |
| 0.01493 | 0.02993 | 0.007420 | 0.01488 | 0.346 |
| 0.01304 | 0.02614 | 0.006521 | 0.01307 | 0.272 |
| 0.009554 | 0.01916 | 0.004834 | 0.009693 | 0.160 |

L-TRYPTOPHAN / D-METHIONINE

| mLi(TRP) | mDi(MET) | mLf(TRP) | mDf(MET) | H** |
| --- | --- | --- | --- | --- |
| 0.01036 | 0.01671 | 0.005224 | 0.008421 | 0.171 |
| 0.01488 | 0.02399 | 0.007397 | 0.01192 | 0.327 |
| 0.01967 | 0.03171 | 0.009633 | 0.01553 | 0.556 |
| 0.01713 | 0.02761 | 0.008454 | 0.01363 | 0.425 |
| 0.01248 | 0.02012 | 0.006251 | 0.01008 | 0.234 |
| 0.01036 | 0.01671 | 0.005224 | 0.008421 | 0.176 |
| 0.01488 | 0.02399 | 0.007397 | 0.01192 | 0.341 |
| 0.01967 | 0.03171 | 0.009633 | 0.01553 | 0.563 |
| 0.01713 | 0.02761 | 0.008454 | 0.01363 | 0.436 |
| 0.01248 | 0.02012 | 0.006251 | 0.01008 | 0.238 |
| 0.01036 | 0.01671 | 0.005224 | 0.008421 | 0.173 |
| 0.01488 | 0.02399 | 0.007397 | 0.01192 | 0.338 |
| 0.01967 | 0.03171 | 0.009633 | 0.01553 | 0.571 |
| 0.01713 | 0.02761 | 0.008454 | 0.01363 | 0.440 |
| 0.01248 | 0.02012 | 0.006251 | 0.01008 | 0.243 |
| 0.01036 | 0.01671 | 0.005224 | 0.008421 | 0.173 |
| 0.01488 | 0.02399 | 0.007397 | 0.01192 | 0.336 |
| 0.01967 | 0.03171 | 0.009633 | 0.01553 | 0.572 |
| 0.01713 | 0.02761 | 0.008454 | 0.01363 | 0.442 |
| 0.01248 | 0.02012 | 0.006251 | 0.01008 | 0.232 |

L-TRYPTOPHAN / L-CITRULLINE

| mLi(TRP) | mLi(CTR) | mLf(TRP) | mLf(CTR) | H** |
| --- | --- | --- | --- | --- |
| 0.007041 | 0.01556 | 0.003559 | 0.007868 | 0.187 |
| 0.01011 | 0.02235 | 0.005040 | 0.01114 | 0.364 |
| 0.01336 | 0.02953 | 0.006564 | 0.01451 | 0.597 |
| 0.01163 | 0.02571 | 0.005760 | 0.01273 | 0.479 |
| 0.008481 | 0.01875 | 0.004259 | 0.009415 | 0.276 |
| 0.007041 | 0.01556 | 0.003559 | 0.007868 | 0.195 |
| 0.01011 | 0.02235 | 00.005040 | 0.01114 | 0.406 |
| 0.01336 | 0.02953 | 0.006564 | 0.01451 | 0.612 |
| 0.01163 | 0.02571 | 0.005760 | 0.01273 | 0.479 |
| 0.008481 | 0.01875 | 0.004259 | 0.009415 | 0.276 |
| 0.007041 | 0.01556 | 0.003559 | 0.007868 | 0.191 |
| 0.01011 | 0.02235 | 0.005040 | 0.01114 | 0.368 |
| 0.01336 | 0.02953 | 0.006564 | 0.01451 | 0.601 |
| 0.01163 | 0.02571 | 0.005760 | 0.01273 | 0.475 |
| 0.008481 | 0.01875 | 0.004259 | 0.009415 | 0.265 |
| 0.007041 | 0.01556 | 0.003559 | 0.007868 | 0.214 |
| 0.01336 | 0.02953 | 0.006564 | 0.01451 | 0.589 |
| 0.01163 | 0.02571 | 0.005760 | 0.01273 | 0.475 |
| 0.008481 | 0.01875 | 0.004259 | 0.009415 | 0.273 |

D-TRYPTOPHAN / L-CITRULLINE

| mDi(TRP) | mLi(CTR) | mDf(TRP) | mLf(CTR) | H** |
| --- | --- | --- | --- | --- |
| 0.007062 | 0.02007 | 0.003565 | 0.01013 | 0.250 |
| 0.01019 | 0.02895 | 0.005060 | 0.01438 | 0.457 |
| 0.01352 | 0.03843 | 0.006604 | 0.01877 | 0.712 |
| 0.01175 | 0.03338 | 0.005789 | 0.01645 | 0.605 |
| 0.008524 | 0.02422 | 0.004271 | 0.01214 | 0.334 |
| 0.007062 | 0.02007 | 0.003565 | 0.01013 | 0.232 |
| 0.01019 | 0.02895 | 0.005060 | 0.01438 | 0.476 |
| 0.01352 | 0.03843 | 0.006604 | 0.01877 | 0.716 |
| 0.01175 | 0.03338 | 0.005789 | 0.01645 | 0.568 |
| 0.008524 | 0.02422 | 0.004271 | 0.01214 | 0.327 |
| 0.007062 | 0.02007 | 0.003665 | 0.01013 | 0.236 |
| 0.01019 | 0.02895 | 0.005060 | 0.01438 | 0.461 |
| 0.01352 | 0.03843 | 0.006604 | 0.01877 | 0.735 |
| 0.01175 | 0.03338 | 0.005789 | 0.01645 | 0.583 |
| 0.008524 | 0.02422 | 0.004271 | 0.01214 | 0.334 |
| 0.007062 | 0.02007 | 0.003565 | 0.01013 | 0.239 |
| 0.01019 | 0.02895 | 0.005060 | 0.01438 | 0.450 |
| 0.01352 | 0.03843 | 0.006604 | 0.01877 | 0.751 |
| 0.01175 | 0.03338 | 0.005789 | 0.01645 | 0.602 |
| 0.008524 | 0.02422 | 0.004271 | 0.01214 | 0.361 |

L-PHENYLALANINE / GLYCINE

| mLi(PHE) | mi(GLY) | mLf(PHE) | mLf(GLY) | H** |
| --- | --- | --- | --- | --- |
| 0.02278 | 0.06708 | 0.01129 | 0.03325 | 0.112 |
| 0.03719 | 0.1095 | 0.01827 | 0.05379 | 0.256 |
| 0.04180 | 0.1230 | 0.02048 | 0.06029 | 0.350 |
| 0.02723 | 0.08017 | 0.01346 | 0.03963 | 0.172 |
| 0.02278 | 0.06708 | 0.01129 | 0.03325 | 0.112 |
| 0.03719 | 0.1095 | 0.01827 | 0.05379 | 0.256 |
| 0.04180 | 0.1231 | 0.02048 | 0.06029 | 0.350 |
| 0.02278 | 0.06708 | 0.01129 | 0.03325 | 0.112 |
| 0.03719 | 0.1095 | 0.01827 | 0.05379 | 0.294 |
| 0.04180 | 0.1231 | 0.02048 | 0.06029 | 0.350 |
| 0.02723 | 0.08017 | 0.01346 | 0.03963 | 0.172 |

**D-GLUTAMINE / GLYCINE**

| mLi(GLN) | mi(GLY) | mLf(GLN) | mf(GLY) | H** |
| --- | --- | --- | --- | --- |
| 0.01452 | 0.04628 | 0.007139 | 0.02276 | 0.202 |
| 0.02077 | 0.06620 | 0.01009 | 0.03215 | 0.367 |
| 0.02734 | 0.08714 | 0.01311 | 0.04178 | 0.548 |
| 0.02386 | 0.07604 | 0.01152 | 0.03671 | 0.464 |
| 0.01746 | 0.05564 | 0.008534 | 0.02720 | 0.281 |
| 0.01452 | 0.04628 | 0.007139 | 0.02276 | 0.191 |
| 0.02077 | 0.06620 | 0.01009 | 0.03215 | 0.355 |
| 0.02734 | 0.08714 | 0.01311 | 0.04178 | 0.548 |
| 0.02386 | 0.07604 | 0.01152 | 0.03671 | 0.476 |
| 0.01746 | 0.05564 | 0.008534 | 0.02720 | 0.269 |
| 0.01452 | 0.04628 | 0.007139 | 0.02276 | 0.191 |
| 0.02077 | 0.06620 | 0.01009 | 0.03215 | 0.367 |
| 0.02734 | 0.08714 | 0.01311 | 0.04178 | 0.584 |
| 0.02386 | 0.07604 | 0.01152 | 0.03671 | 0.488 |
| 0.01746 | 0.05564 | 0.008534 | 0.02720 | 0.305 |
| 0.01452 | 0.04628 | 0.007139 | 0.02276 | 0.226 |
| 0.02077 | 0.06620 | 0.01009 | 0.03215 | 0.414 |
| 0.02734 | 0.08714 | 0.01311 | 0.04178 | 0.584 |
| 0.02386 | 0.07604 | 0.01152 | 0.03671 | 0.488 |
| 0.01746 | 0.05564 | 0.008534 | 0.02720 | 0.305 |

L -ASPARAGINE / GLYCINE

| mLi(ASN) | mL(GLY) | mLf(ASN) | mf(GLY) | H** |
| --- | --- | --- | --- | --- |
| 0.01033 | 0.04676 | 0.005080 | 0.0230 | 0.236 |
| 0.01473 | 0.06670 | 0.007167 | 0.0324 | 0.424 |
| 0.01933 | 0.08752 | 0.009300 | 0.0421 | 0.661 |
| 0.01690 | 0.07650 | 0.008177 | 0.0370 | 0.542 |
| 0.01240 | 0.05615 | 0.006068 | 0.0275 | 0.331 |
| 0.01033 | 0.04676 | 0.005080 | 0.0230 | 0.248 |
| 0.01473 | 0.06670 | 0.007167 | 0.0324 | 0.436 |
| 0.01933 | 0.08752 | 0.009300 | 0.0421 | 0.673 |
| 0.01690 | 0.07650 | 0.008177 | 0.0370 | 0.566 |
| 0.01240 | 0.05615 | 0.006068 | 0.0275 | 0.331 |
| 0.01033 | 0.04676 | 0.005080 | 0.0230 | 0.236 |
| 0.01473 | 0.06670 | 0.007167 | 0.0324 | 0.436 |
| 0.01933 | 0.08752 | 0.009300 | 0.0421 | 0.661 |
| 0.01690 | 0.07652 | 0.008177 | 0.0370 | 0.566 |
| 0.01240 | 0.05615 | 0.006068 | 0.0275 | 0.343 |
| 0.01033 | 0.04676 | 0.005080 | 0.0230 | 0.236 |
| 0.01473 | 0.06670 | 0.007167 | 0.0324 | 0.424 |
| 0.01933 | 0.08752 | 0.009300 | 0.0421 | 0.709 |
| 0.01690 | 0.07650 | 0.008177 | 0.0370 | 0.602 |
| 0.01240 | 0.05615 | 0.006068 | 0.0275 | 0.355 |

L-CYSTEINE / GLYCINE

| mLi(CYS) | mL(GLY) | mLf(CYS) | mf(GLY) | H** |
| --- | --- | --- | --- | --- |
| 0.0400 | 0.02938 | 0.02006 | 0.01473 | 0.134 |
| 0.0667 | 0.04896 | 0.03279 | 0.02408 | 0.387 |
| 0.0754 | 0.05539 | 0.03686 | 0.02707 | 0.513 |
| 0.0481 | 0.03534 | 0.02398 | 0.01761 | 0.263 |
| 0.0400 | 0.02938 | 0.02006 | 0.01473 | 0.157 |
| 0.0667 | 0.04896 | 0.03279 | 0.02408 | 0.410 |
| 0.0754 | 0.05539 | 0.03686 | 0.02707 | 0.467 |
| 0.0481 | 0.03534 | 0.02398 | 0.01761 | 0.263 |
| 0.0400 | 0.02938 | 0.02006 | 0.01473 | 0.123 |
| 0.0667 | 0.04896 | 0.03279 | 0.02408 | 0.410 |
| 0.0754 | 0.05539 | 0.03686 | 0.02707 | 0.536 |
| 0.0481 | 0.03534 | 0.02398 | 0.01761 | 0.218 |

L-METHIONINE / GLYCINE

| mLi(MET) | mi(GLY) | mLf(MET) | mf(GLY) | H** |
| --- | --- | --- | --- | --- |
| 0.02612 | 0.03663 | 0.01315 | 0.01844 | 0.121 |
| 0.04356 | 0.06109 | 0.02150 | 0.03016 | 0.254 |
| 0.04930 | 0.06914 | 0.02418 | 0.03391 | 0.309 |
| 0.03142 | 0.04407 | 0.01572 | 0.02205 | 0.151 |
| 0.02612 | 0.03663 | 0.01315 | 0.01844 | 0.0764 |
| 0.04356 | 0.06109 | 0.02150 | 0.03016 | 0.232 |
| 0.04930 | 0.06914 | 0.02418 | 0.03391 | 0.309 |
| 0.03142 | 0.04407 | 0.01572 | 0.02205 | 0.140 |
| 0.02612 | 0.03663 | 0.01315 | 0.01844 | 0.0988 |
| 0.04356 | 0.06109 | 0.02150 | 0.03016 | 0.254 |
| 0.04930 | 0.06914 | 0.02418 | 0.03391 | 0.309 |
| 0.03142 | 0.04407 | 0.01572 | 0.02205 | 0.151 |

L-CITRULLINE / GLYCINE

| mLi(CTR) | mi(GLY) | mLf(CTR) | mfGLY) | H** |
| --- | --- | --- | --- | --- |
| 0.01690 | 0.03561 | 0.008306 | 0.01750 | 0.189 |
| 0.02413 | 0.05083 | 0.01172 | 0.02469 | 0.320 |
| 0.03169 | 0.06675 | 0.01522 | 0.03205 | 0.470 |
| 0.02769 | 0.05832 | 0.01338 | 0.02818 | 0.393 |
| 0.02031 | 0.04277 | 0.009924 | 0.02090 | 0.250 |
| 0.01690 | 0.03561 | 0.008306 | 0.01750 | 0.166 |
| 0.02413 | 0.05083 | 0.01172 | 0.02469 | 0.296 |
| 0.03169 | 0.06675 | 0.01522 | 0.03205 | 0.446 |
| 0.02769 | 0.05832 | 0.01338 | 0.02818 | 0.381 |
| 0.02031 | 0.04277 | 0.009924 | 0.02090 | 0.238 |
| 0.01690 | 0.03561 | 0.008306 | 0.01750 | 0.166 |
| 0.02413 | 0.05083 | 0.01172 | 0.02469 | 0.284 |
| 0.03169 | 0.06675 | 0.01522 | 0.03205 | 0.434 |
| 0.02769 | 0.05832 | 0.01338 | 0.02818 | 0.369 |
| 0.02031 | 0.04277 | 0.009924 | 0.02090 | 0.226 |
| 0.01690 | 0.03561 | 0.008306 | 0.01750 | 0.166 |
| 0.02413 | 0.05083 | 0.01172 | 0.02469 | 0.296 |
| 0.03169 | 0.06675 | 0.01522 | 0.03205 | 0.446 |
| 0.02769 | 0.05832 | 0.01338 | 0.02818 | 0.381 |
| 0.02031 | 0.04277 | 0.009924 | 0.02090 | 0.238 |

D-TRYPTOPHAN / GLYCINE

| mDi(TRP) | mi(GLY) | mDf(TRP) | mfGLY) | H** |
| --- | --- | --- | --- | --- |
| 0.007393 | 0.02608 | 0.003648 | 0.01287 | 0.182 |
| 0.01056 | 0.03724 | 0.005151 | 0.01817 | 0.333 |
| 0.01387 | 0.04892 | 0.006687 | 0.02359 | 0.526 |
| 0.01211 | 0.04273 | 0.005878 | 0.02073 | 0.419 |
| 0.008881 | 0.03133 | 0.004360 | 0.01538 | 0.206 |
| 0.007393 | 0.02608 | 0.003649 | 0.01287 | 0.159 |
| 0.01056 | 0.03724 | 0.005151 | 0.01817 | 0.309 |
| 0.01387 | 0.04892 | 0.006687 | 0.02359 | 0.514 |
| 0.01211 | 0.04273 | 0.005878 | 0.02073 | 0.407 |
| 0.008882 | 0.03133 | 0.004360 | 0.01538 | 0.202 |
| 0.007393 | 0.02608 | 0.003649 | 0.01287 | 0.167 |
| 0.01056 | 0.03724 | 0.005151 | 0.01817 | 0.317 |
| 0.01387 | 0.04892 | 0.006687 | 0.02359 | 0.518 |
| 0.01211 | 0.04273 | 0.005878 | 0.02073 | 0.415 |
| 0.008882 | 0.03133 | 0.004360 | 0.01538 | 0.206 |
| 0.007393 | 0.02608 | 0.003649 | 0.01287 | 0.178 |
| 0.01056 | 0.03724 | 0.005151 | 0.01817 | 0.329 |
| 0.01387 | 0.04892 | 0.006687 | 0.02359 | 0.522 |
| 0.01211 | 0.04273 | 0.005878 | 0.02073 | 0.423 |
| 0.008882 | 0.03133 | 0.004360 | 0.01538 | 0.210 |
| 0.006655 | 0.09583 | 0.003277 | 0.04718 | 0.341 |
| 0.009502 | 0.1368 | 0.004625 | 0.06660 | 0.632 |
| 0.01090 | 0.1570 | 0.005278 | 0.07599 | 0.822 |
| 0.007995 | 0.1151 | 0.003915 | 0.05637 | 0.521 |
| 0.006655 | 0.09583 | 0.003277 | 0.04718 | 0.361 |
| 0.009502 | 0.1368 | 0.004625 | 0.06660 | 0.632 |
| 0.01090 | 0.1570 | 0.005278 | 0.07599 | 0.782 |
| 0.007995 | 0.1151 | 0.003915 | 0.05637 | 0.521 |
| 0.006655 | 0.09583 | 0.003277 | 0.04718 | 0.321 |
| 0.009502 | 0.1368 | 0.004626 | 0.06660 | 0.632 |
| 0.01090 | 0.1570 | 0.005278 | 0.07599 | 0.782 |
| 0.007995 | 0.1151 | 0.003915 | 0.05637 | 0.561 |
| 0.006655 | 0.09583 | 0.003277 | 0.04718 | 0.321 |
| 0.009502 | 0.1368 | 0.004626 | 0.06660 | 0.592 |
| 0.01090 | 0.1570 | 0.005278 | 0.07599 | 0.822 |
| 0.007995 | 0.1151 | 0.003915 | 0.05637 | 0.522 |
| 0.007258 | 0.05234 | 0.003572 | 0.02576 | 0.253 |
| 0.01040 | 0.07498 | 0.005051 | 0.03642 | 0.470 |
| 0.01371 | 0.09883 | 0.006567 | 0.04735 | 0.733 |
| 0.01195 | 0.08618 | 0.005768 | 0.04159 | 0.617 |
| 0.008733 | 0.06297 | 0.004272 | 0.03080 | 0.385 |
| 0.007258 | 0.05234 | 0.003572 | 0.02576 | 0.265 |
| 0.01040 | 0.07498 | 0.005051 | 0.03642 | 0.471 |
| 0.01371 | 0.09883 | 0.006567 | 0.04735 | 0.745 |
| 0.01195 | 0.08618 | 0.005768 | 0.04159 | 0.605 |
| 0.008733 | 0.06297 | 0.004272 | 0.03080 | 0.361 |
| 0.007258 | 0.05234 | 0.003572 | 0.02576 | 0.253 |
| 0.01040 | 0.07498 | 0.005051 | 0.03642 | 0.482 |
| 0.01371 | 0.09883 | 0.006567 | 0.04735 | 0.745 |
| 0.01195 | 0.08618 | 0.005768 | 0.04159 | 0.605 |
| 0.008733 | 0.06297 | 0.004272 | 0.03080 | 0.373 |
| 0.007258 | 0.05234 | 0.003572 | 0.02576 | 0.253 |
| 0.01040 | 0.07498 | 0.005051 | 0.03642 | 0.482 |
| 0.01371 | 0.09883 | 0.006567 | 0.04735 | 0.757 |
| 0.01195 | 0.08618 | 0.005768 | 0.04159 | 0.629 |
| 0.008733 | 0.06297 | 0.004272 | 0.03080 | 0.361 |

L-PHENYLALANINE / FORMAMIDE

| mLi(PHE) | mi(FA) | mLf(PHE) | mf(FA) | H** |
| --- | --- | --- | --- | --- |
| 0.02671 | 0.02837 | 0.01334 | 0.01417 | 0.0305 |
| 0.03841 | 0.04080 | 0.01891 | 0.02008 | 0.0808 |
| 0.05083 | 0.05400 | 0.02463 | 0.02617 | 0.143 |
| 0.04423 | 0.04698 | 0.02161 | 0.02296 | 0.0828 |
| 0.03219 | 0.03420 | 0.01597 | 0.01697 | 0.0301 |
| 0.02671 | 0.02837 | 0.01334 | 0.01417 | 0.0305 |
| 0.03841 | 0.04080 | 0.01891 | 0.02008 | 0.0692 |
| 0.05083 | 0.05399 | 0.02463 | 0.02617 | 0.143 |
| 0.04423 | 0.04698 | 0.02161 | 0.02296 | 0.0946 |
| 0.03219 | 0.03420 | 0.01597 | 0.01697 | 0.0301 |
| 0.02671 | 0.02837 | 0.01334 | 0.01417 | 0.0305 |
| 0.03841 | 0.04080 | 0.01891 | 0.02008 | 0.0692 |
| 0.05083 | 0.05399 | 0.02463 | 0.02617 | 0.155 |
| 0.04423 | 0.04698 | 0.02161 | 0.02296 | 0.0946 |
| 0.03219 | 0.03420 | 0.01597 | 0.01697 | 0.0417 |
| 0.02671 | 0.02837 | 0.01334 | 0.01417 | 0.0305 |
| 0.03841 | 0.04080 | 0.01891 | 0.02008 | 0.0808 |
| 0.05083 | 0.05399 | 0.02463 | 0.02617 | 0.155 |
| 0.04423 | 0.04698 | 0.02161 | 0.02296 | 0.0946 |
| 0.03219 | 0.03420 | 0.01597 | 0.01697 | 0.0417 |

L-LEUCINE / FORMAMIDE

| mLi(LEU) | mi(FA) | mLf(LEU) | mf(FA) | H** |
| --- | --- | --- | --- | --- |
| 0.01559 | 0.02990 | 0.007787 | 0.01493 | -0.0343 |
| 0.02443 | 0.04302 | 0.01103 | 0.02116 | -0.0893 |
| 0.02970 | 0.05696 | 0.01438 | 0.02758 | -0.167 |
| 0.02584 | 0.04955 | 0.01262 | 0.02419 | -0.122 |
| 0.01880 | 0.03605 | 0.009322 | 0.01788 | -0.0656 |
| 0.01559 | 0.02990 | 0.007787 | 0.01493 | -0.0343 |
| 0.02243 | 0.04302 | 0.01103 | 0.02116 | -0.0893 |
| 0.02970 | 0.05696 | 0.01438 | 0.02758 | -0.167 |
| 0.02584 | 0.04955 | 0.01262 | 0.02419 | -0.132 |
| 0.01880 | 0.03605 | 0.009322 | 0.01788 | -0.0764 |
| 0.01560 | 0.02990 | 0.007787 | 0.01493 | -0.0451 |
| 0.02243 | 0.04302 | 0.01103 | 0.02116 | -0.111 |
| 0.02970 | 0.05696 | 0.01438 | 0.02758 | -0.178 |
| 0.02584 | 0.04955 | 0.01262 | 0.02419 | -0.145 |
| 0.01880 | 0.03605 | 0.009322 | 0.01788 | -0.0658 |
| 0.01559 | 0.02990 | 0.007787 | 0.01493 | -0.0344 |
| 0.02243 | 0.04302 | 0.01103 | 0.02116 | -0.100 |
| 0.02970 | 0.05696 | 0.01438 | 0.02758 | -0.167 |
| 0.02584 | 0.04955 | 0.01262 | 0.02419 | -0.133 |
| 0.01880 | 0.03605 | 0.009322 | 0.01788 | -0.0548 |

D-TRYPTOFAN / UREA

| mDi(TRP) | m(UREA) | mDf(TRP) | mf(UREA) | H** |
| --- | --- | --- | --- | --- |
| 0.007037 | 0.008288 | 0.003555 | 0.004186 | 0.112 |
| 0.01013 | 0.01193 | 0.005040 | 0.005935 | 0.211 |
| 0.01342 | 0.01581 | 0.006572 | 0.007740 | 0.341 |
| 0.01167 | 0.01375 | 0.005763 | 0.006787 | 0.269 |
| 0.008487 | 0.009995 | 0.004256 | 0.005012 | 0.155 |
| 0.007037 | 0.008288 | 0.003555 | 0.004186 | 0.112 |
| 0.01013 | 0.01193 | 0.005040 | 0.005935 | 0.204 |
| 0.01342 | 0.01581 | 0.006572 | 0.007740 | 0.334 |
| 0.01167 | 0.01375 | 0.005763 | 0.006787 | 0.258 |
| 0.008487 | 0.009995 | 0.004256 | 0.005012 | 0.155 |
| 0.007037 | 0.008288 | 0.003555 | 0.004186 | 0.109 |
| 0.01013 | 0.01193 | 0.005040 | 0.005935 | 0.204 |
| 0.01342 | 0.01581 | 0.006572 | 0.007740 | 0.337 |
| 0.01167 | 0.01375 | 0.005763 | 0.006787 | 0.254 |
| 0.008487 | 0.009995 | 0.004256 | 0.005012 | 0.144 |
| 0.007037 | 0.008288 | 0.003555 | 0.004186 | 0.109 |
| 0.01013 | 0.01193 | 0.005040 | 0.005935 | 0.207 |
| 0.01342 | 0.01581 | 0.006572 | 0.007740 | 0.330 |
| 0.01167 | 0.01375 | 0.005763 | 0.006787 | 0.265 |
| 0.008487 | 0.009995 | 0.004256 | 0.005012 | 0.155 |

**L-TRYPTOFAN / FORMAMIDE**

| mLi(TRP) | mi(FA) | mLf(TRP) | mf(FA) | H** |
| --- | --- | --- | --- | --- |
| 0.01254 | 0.01697 | 0.006143 | 0.008316 | 0.290 |
| 0.006599 | 0.008932 | 0.003330 | 0.004507 | 0.101 |
| 0.009481 | 0.01283 | 0.004716 | 0.006384 | 0.180 |
| 0.01254 | 0.01697 | 0.003143 | 0.008316 | 0.301 |
| 0.01091 | 0.01477 | 0.005391 | 0.007297 | 0.237 |
| 0.007951 | 0.01076 | 0.003985 | 0.005394 | 0.140 |
| 0.006599 | 0.008932 | 0.003330 | 0.004507 | 0.101 |
| 0.009481 | 0.01283 | 0.004716 | 0.006384 | 0.184 |
| 0.01254 | 0.01697 | 0.006143 | 0.008316 | 0.286 |
| 0.01091 | 0.01477 | 0.005391 | 0.007297 | 0.230 |
| 0.007951 | 0.01076 | 0.003985 | 0.005394 | 0.140 |
| 0.006599 | 0.008932 | 0.003330 | 0.004507 | 0.101 |
| 0.009481 | 0.01283 | 0.004716 | 0.006384 | 0.184 |
| 0.01254 | 0.01697 | 0.006143 | 0.008316 | 0.293 |
| 0.01091 | 0.01477 | 0.005391 | 0.007297 | 0.234 |
| 0.007951 | 0.01076 | 0.003985 | 0.005394 | 0.143 |
| 0.006599 | 0.008932 | 0.003330 | 0.004507 | 0.104 |
| 0.009481 | 0.01283 | 0.004716 | 0.006384 | 0.184 |
| 0.01254 | 0.01697 | 0.006143 | 0.008316 | 0.293 |
| 0.01091 | 0.01477 | 0.005391 | 0.007297 | 0.234 |
| 0.007951 | 0.01076 | 0.003985 | 0.005394 | 0.143 |
